# Supplementary material for: Green synthesis of silver and palladium nanocomposites: a study of catalytic activity towards etherification reaction
Source: Royal Society of Chemistry journal article supplement (doi:10.1039/d0ma00596g), 2020-01-01
Supplement: d0ma00596g1.pdf [file d0ma00596g1.pdf]

## Supporting Information

### Green Synthesis of Silver and Palladium Nanocomposites: A Study of Catalytic Activity towards Etherification Reaction

Pritam Singh<sup>1</sup>, Mita Halder<sup>1,2</sup>, Santanu Ray<sup>3</sup>, Adity Bose<sup>4</sup> and Kamalika Sen<sup>1\*</sup>

<sup>1</sup>Department of Chemistry, University of Calcutta, 92, A. P. C. Road, Kolkata 700009, India

<sup>2</sup>Department of Chemistry, Indian Institute of Technology Kanpur, Kanpur 208016, India

<sup>3</sup>Surface Analysis Laboratory, School of Environment and Technology, University of Brighton, Brighton, BN2 4GJ, United Kingdom

<sup>4</sup>Department of Chemistry, Presidency University, 86/1 College Street, Kolkata 700073, India

\*E-mail: [kamalchem.roy@gmail.com](mailto:kamalchem.roy@gmail.com)

#### Table of content

|                                                                                                                  | Page No. |
|------------------------------------------------------------------------------------------------------------------|----------|
| <b>Section I</b>                                                                                                 |          |
| Few reports on the biosynthesis of silver and palladium nanocomposites                                           | S2-S4    |
| <b>Section II</b>                                                                                                |          |
| Spectral study for interaction between rutin and metal solution at different pHs with the feed composition table | S5-S8    |
| <b>Section III</b>                                                                                               |          |
| XPS figures                                                                                                      | S9-S10   |
| <b>Section IV</b>                                                                                                |          |
| Reaction Optimization                                                                                            | S11-S12  |
| <b>Section V</b>                                                                                                 |          |
| Comparison of the work                                                                                           | S13-S14  |
| <b>Section VI</b>                                                                                                |          |
| <sup>1</sup> H and <sup>13</sup> C-NMR spectra of the synthesized products                                       | S15-S20  |
| References                                                                                                       | S21-S23  |

## Section I

**Table S1** Few reports on the biosynthesis of silver and palladium nanocomposites

| Entry                | Biomaterial                             | Condition of synthesis                                                                                                                                                                                                 | Reactants                  | Particle size (nm) | Ref |
|----------------------|-----------------------------------------|------------------------------------------------------------------------------------------------------------------------------------------------------------------------------------------------------------------------|----------------------------|--------------------|-----|
| Silver Nanocomposite | Guar gum (GG)                           | GG was dissolved in 10 mL of water (pH 6). After complete dissolution, the temperature was increased to 70 °C and then reactant was added                                                                              | AgNO <sub>3</sub> solution | 4-12               | 1   |
|                      | Latex from <i>Jatropha Curcas</i> plant | 3% latex solution was formed by diluting with water and the same amount of reactant was mixed                                                                                                                          | AgNO <sub>3</sub> solution | ~20-35             | 2   |
|                      | Carboxymethyl cellulose sodium (CMS)    | 10 mL of reactant was mixed with certain volume of 0.1% CMS with continuous stirring                                                                                                                                   | AgNO <sub>3</sub> solution | ~15                | 3   |
|                      | <i>Terminalia Chebula</i> fruit         | Aqueous extract of fruit was treated with reactant solution                                                                                                                                                            | AgNO <sub>3</sub> solution | 25                 | 4   |
|                      | Leaf extract of <i>Mimusops elengi</i>  | The crude extract was first filtered and then mixed with a reactant                                                                                                                                                    | AgNO <sub>3</sub> solution | 55-83              | 5   |
|                      | Glucose                                 | NH <sub>3</sub> was added slowly to the reactant solution to get AgOH/Ag <sub>2</sub> O ppt. Then the Ag(NH <sub>3</sub> ) <sub>2</sub> OH solution was mixed with graphene oxide (GO) and glucose-containing solution | AgNO <sub>3</sub> solution | --                 | 6   |

|                         |                                                    |                                                                                                                                                                                                            |                                                   |              |    |
|-------------------------|----------------------------------------------------|------------------------------------------------------------------------------------------------------------------------------------------------------------------------------------------------------------|---------------------------------------------------|--------------|----|
|                         | Montmorillonite (MMT)                              | The reactant was dissolved in chitosan solution under constant stirring, then it was added to MMT suspension and vigorously stirred for 4 h at room temperature                                            | AgNO <sub>3</sub> solution                        | 10.97 ± 5.60 | 7  |
| Palladium Nanocomposite | Poly(3,4-ethylenedioxythiophene) (PEDOT)           | The entire process was done in a round-bottom flask equipped with a magnetic stirrer. 3,4-ethylenedioxythiophene (EDOT) alcoholic solution was rapidly added into reactant under vigorous stirring for 3 h | H <sub>2</sub> PdCl <sub>4</sub> solution         | ~4.5         | 8  |
|                         | Reduced graphene oxide (rGO)-carbon nanotube (CNT) | rGO-CNT was dipped into an aqueous solution of reactant maintained in a vial under vigorous stirring for 30 min in an ice bath                                                                             | K <sub>2</sub> PdCl <sub>4</sub> aqueous solution | 4            | 9  |
|                         | Fruits of <i>Piper Longum</i>                      | Aqueous extract of fruits of <i>piper longum</i> was added to reactant and natrolite zeolite was added and stirred for 15 h at 100 °C                                                                      | PdCl <sub>2</sub> solution                        | –            | 10 |
|                         | <i>Theobroma cacao L.</i> seeds extract            | Cocoa seed aqueous extract was added dropwise to a well-mixed solution of the reactant with constant stirring at 50 °C for 2 h                                                                             | PdCl <sub>2</sub> solution                        | ~40          | 11 |

|                                |                                                  |                                                                                                                                                                                                                                                                |                                            |                                                                     |           |
|--------------------------------|--------------------------------------------------|----------------------------------------------------------------------------------------------------------------------------------------------------------------------------------------------------------------------------------------------------------------|--------------------------------------------|---------------------------------------------------------------------|-----------|
|                                | Extract of marine alga, <i>Sargassum bovinum</i> | Aqueous extract of the reactant was mixed with crude extract of marine alga. The whole mixture was put into a rotary shaker at 60 °C (160 rpm) for 24 h and maintained in the dark                                                                             | PdCl <sub>2</sub> solution                 | ~5                                                                  | 12        |
|                                | g-C <sub>3</sub> N <sub>4</sub>                  | g-C <sub>3</sub> N <sub>4</sub> was dispersed in isopropyl alcohol with sonication in a low power sonic-bath for 30 min. Then it was stirred, and reactant solution (1 M) was added under continuous stirring for 2 h at room temperature                      | Pd(NO <sub>3</sub> ) <sub>2</sub> solution | --                                                                  | 13        |
| Ag, Pd and Ag-Pd nanocomposite | Rutin                                            | Different pH solutions of rutin were treated with same concentration of reactant solution(s). For Ag@rutin, the nanocomposite was obtained within 5 to 10 mins. For the formation of Pd@rutin and Ag-Pd@rutin, around 72 h reaction time was required at 40 °C | AgNO <sub>3</sub> and PdCl <sub>2</sub>    | ~50 nm for Ag@rutin, ~10 nm for Pd@rutin and ~80 nm for Ag-Pd@rutin | This Work |

## Section II

### Spectral Study:

- i) The visual color change of rutin solution adjusted at different pHs with the gradual addition of PdCl<sub>2</sub>, AgNO<sub>3</sub> and PdCl<sub>2</sub>-AgNO<sub>3</sub> mixture

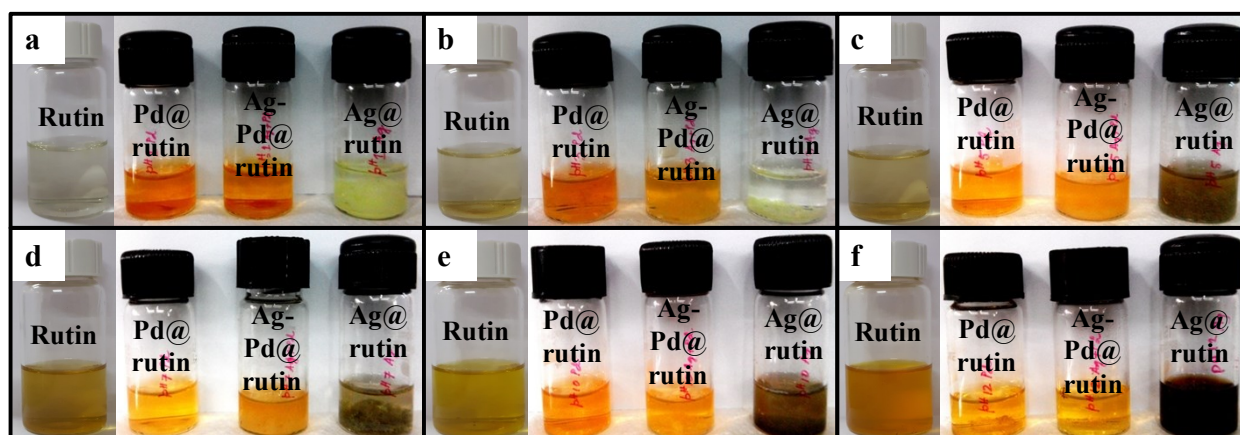

**Fig. S1** Pictorial presentation of pristine rutin, Pd@rutin, Ag-Pd@rutin and Ag@rutin prepared in (a) pH1; (b) pH 3; (c) pH 5; (d) pH 7; (e) pH 9; (f) pH 12.

**Table S2** Feed composition and yield of the prepared nanocomposites

| Nanocomposites | Feed Composition                                                                               | Yield (g) |
|----------------|------------------------------------------------------------------------------------------------|-----------|
| Ag@rutin       | 5 mL 10 mM rutin solution of pH 12 + 5 mL 10 mM AgNO <sub>3</sub> solution                     | 0.0392    |
| Pd@rutin       | 5 mL 10 mM rutin solution of pH 1 (Solution A) + 5 mL 10 mM PdCl <sub>2</sub> solution         | 0.0258    |
| Ag-Pd@rutin    | Solution A + 2.5 mL 10 mM AgNO <sub>3</sub> solution + 2.5 mL 10 mM PdCl <sub>2</sub> solution | 0.0228    |

ii) The absorption spectra of  $\text{AgNO}_3$ ,  $\text{PdCl}_2$  and  $\text{AgNO}_3$ - $\text{PdCl}_2$  mixture in respective pHs.

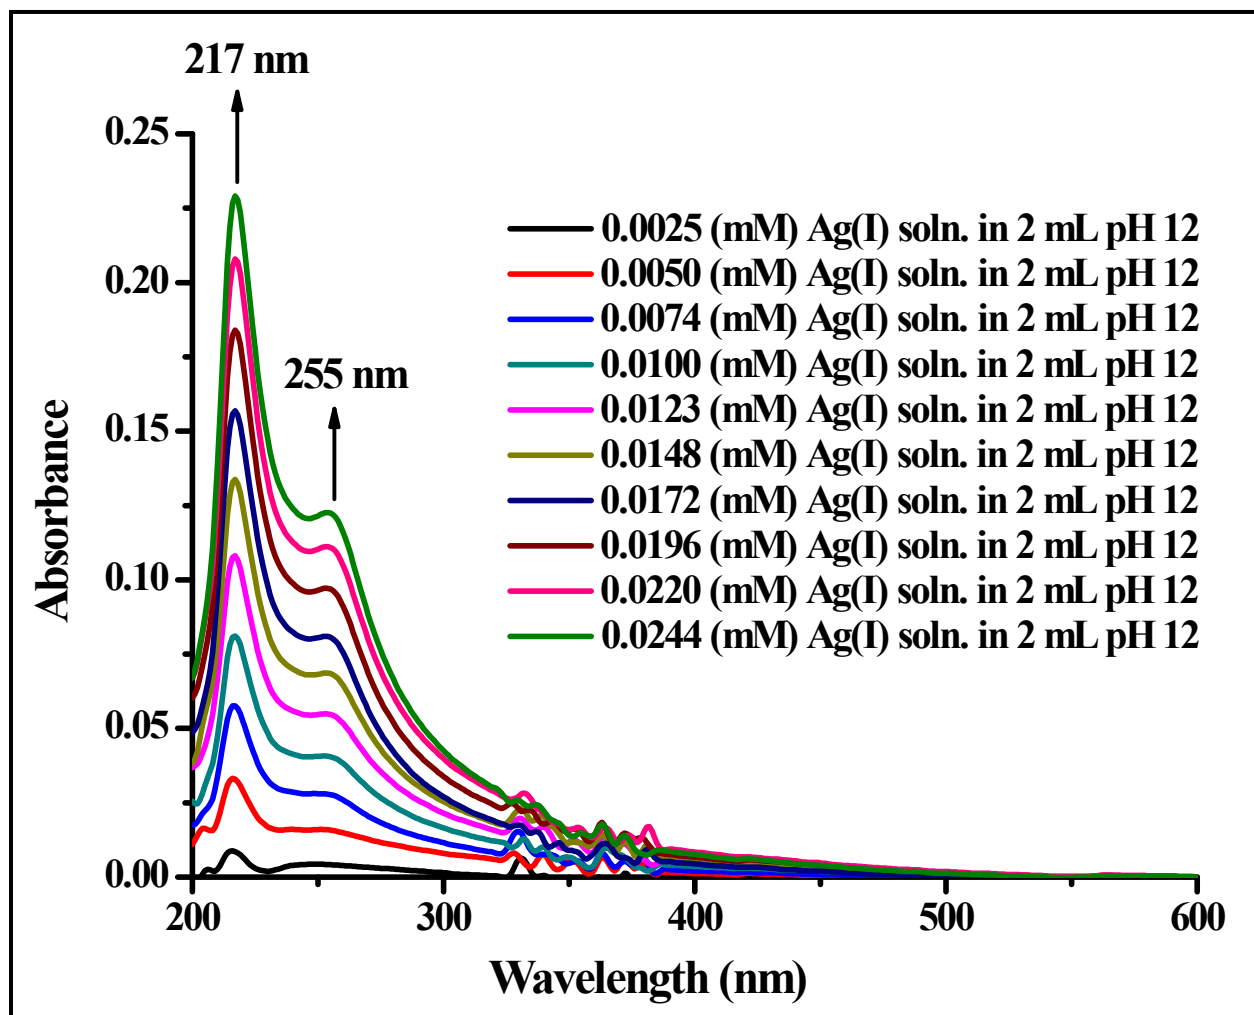

Fig. S2 Absorption spectra of silver in pH 12.

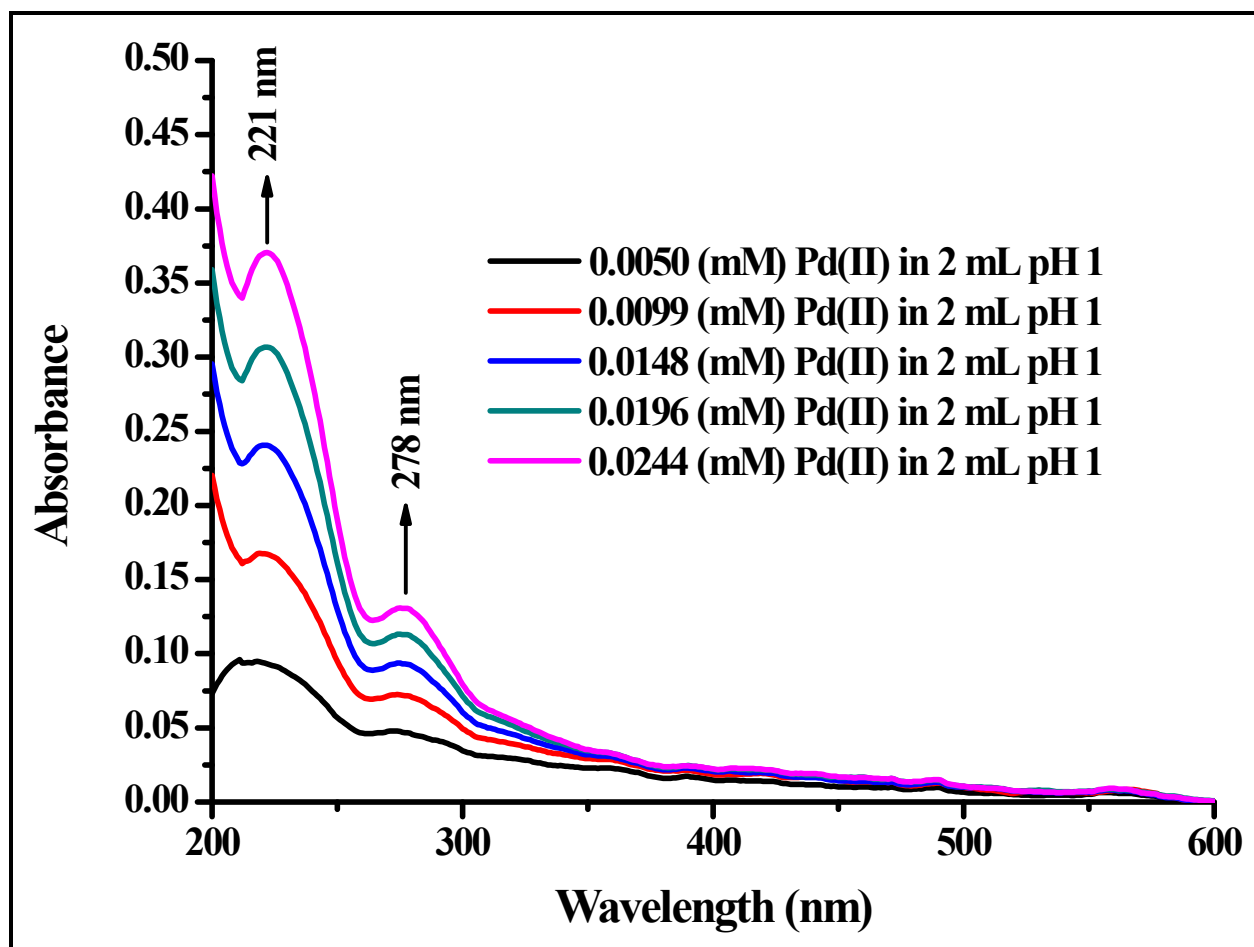

Fig. S3 Absorption spectra of palladium in pH 1 at 40 °C.

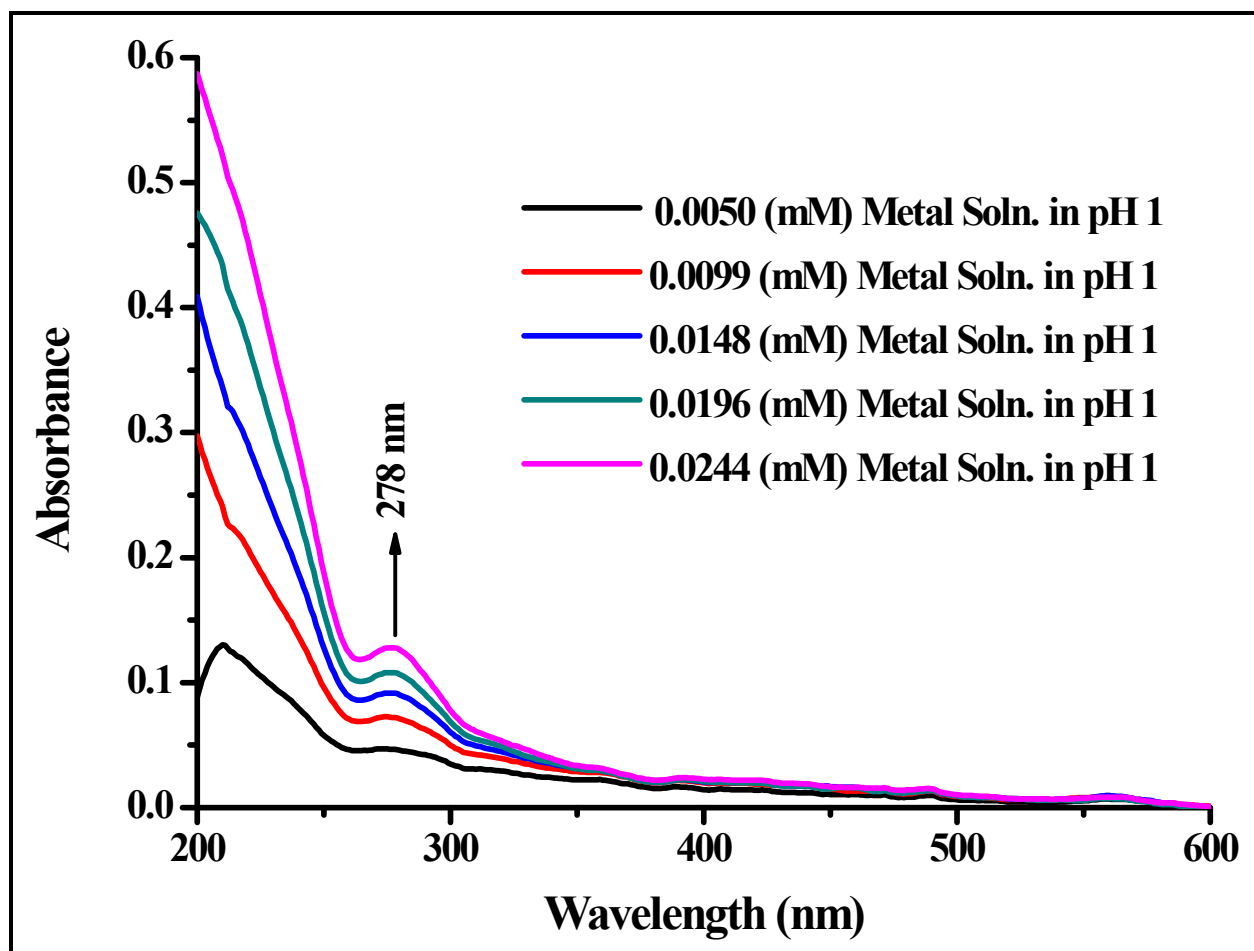

Fig. S4 Absorption spectra of the silver-palladium bimetallic solution in pH 1 at 40 °C.



## Section III

XPS figures:

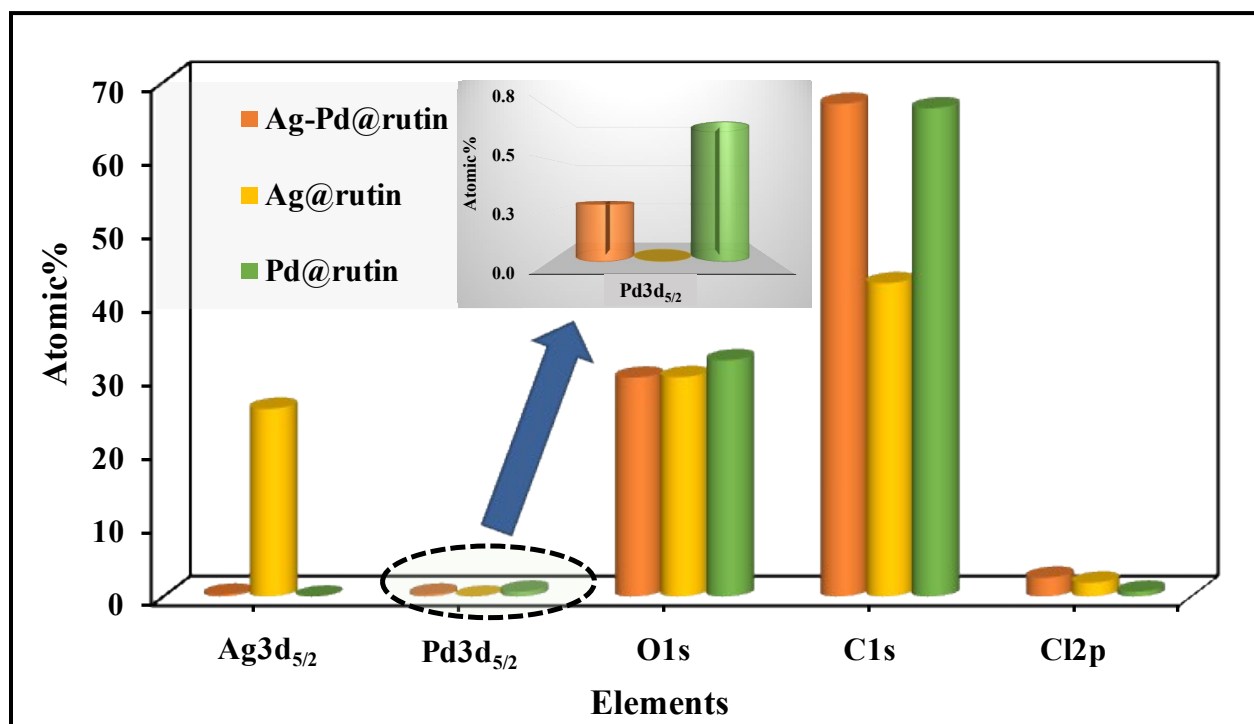

**Fig. S5** Survey scan data of Ag-Pd@rutin, Ag@rutin, and Pd@rutin NC samples with Pd atomic% data zoomed in the inset. Minimum three areas from each sample were acquired and average data is shown above.

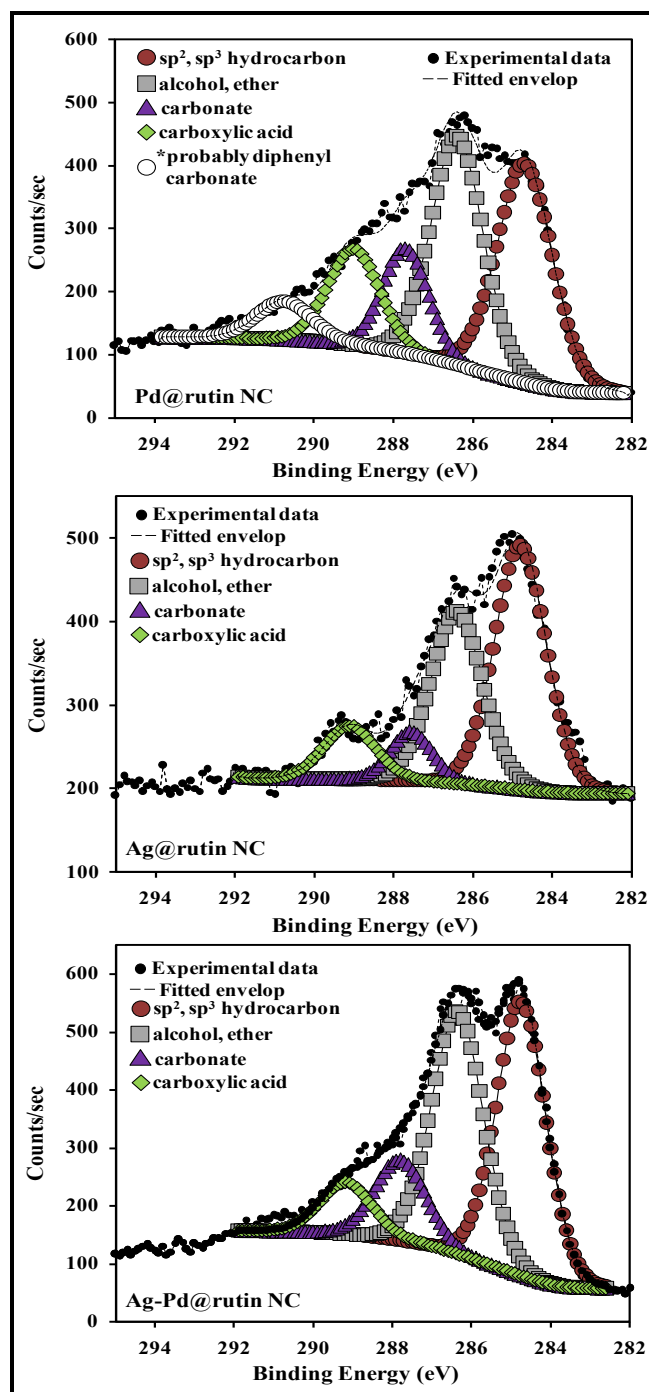

**Fig. S6** Representative C1s narrow scan spectra of NCs of Pd@rutin, Ag@rutin, and Ag-Pd@rutin. The deconvolution of the narrow scan data is carried out with a constraint of mixed sp<sup>2</sup> and sp<sup>3</sup> C1s hydrocarbon peak fixed at 284.75 eV. Necessary post data acquisition peak shifts due to charging are carried out keeping this mixed hydrocarbon peak fixed, which is a standard practice in XPS analysis.

## Section IV

### Reaction Optimization:

Reaction optimization data using Ag@rutin and Ag-Pd@rutin catalyst.

**Table S3** Standardization of reaction conditions using Ag@rutin catalyst<sup>a</sup>

| Entry | Solvent      | Base                            | Temp. (°C) | Time (h)  | Yield <sup>b</sup> (%) |
|-------|--------------|---------------------------------|------------|-----------|------------------------|
| 1     | DMF          | NaHCO <sub>3</sub>              | 120        | 18        | 40                     |
| 2     | Toluene      | NaHCO <sub>3</sub>              | 110        | 18        | 27                     |
| 3     | Acetonitrile | NaHCO <sub>3</sub>              | 78         | 18        | 12                     |
| 4     | <b>Water</b> | <b>NaHCO<sub>3</sub></b>        | <b>100</b> | <b>18</b> | <b>75</b>              |
| 5     | Water        | K <sub>2</sub> CO <sub>3</sub>  | 100        | 18        | 72                     |
| 6     | Water        | Cs <sub>2</sub> CO <sub>3</sub> | 100        | 18        | 32                     |
| 7     | Water        | NaHCO <sub>3</sub>              | 60         | 18        | 43                     |
| 8     | Water        | NaHCO <sub>3</sub>              | rt         | 30        | -                      |
| 9     | Water        | NaHCO <sub>3</sub>              | 100        | 10        | 34                     |
| 10    | Water        | NaHCO <sub>3</sub>              | 100        | 22        | 75                     |

<sup>a</sup>Condition: Cinnamyl acetate (1 mmol), *p*-cresol (1 mmol), base (2 mmol), Ag@rutin (1.7 mg, 0.00027 mol%), solvent, temp., time; <sup>b</sup>Yields refer to those of isolated products.

**Table S4** Standardization of reaction conditions using Ag-Pd@rutin catalyst<sup>a</sup>

| Entry | Solvent      | Base                            | Temp. (°C) | Time (h)  | Yield <sup>b</sup> (%) |
|-------|--------------|---------------------------------|------------|-----------|------------------------|
| 1     | DMF          | NaHCO <sub>3</sub>              | 120        | 18        | 36                     |
| 2     | Toluene      | NaHCO <sub>3</sub>              | 110        | 18        | 8                      |
| 3     | Acetonitrile | NaHCO <sub>3</sub>              | 78         | 18        | <5                     |
| 4     | <b>Water</b> | <b>NaHCO<sub>3</sub></b>        | <b>100</b> | <b>18</b> | <b>72</b>              |
| 5     | Water        | K <sub>2</sub> CO <sub>3</sub>  | 100        | 18        | 67                     |
| 6     | Water        | Cs <sub>2</sub> CO <sub>3</sub> | 100        | 18        | 22                     |
| 7     | Water        | NaHCO <sub>3</sub>              | 60         | 18        | 39                     |
| 8     | Water        | NaHCO <sub>3</sub>              | rt         | 30        | -                      |
| 9     | Water        | NaHCO <sub>3</sub>              | 100        | 10        | 30                     |
| 10    | Water        | NaHCO <sub>3</sub>              | 100        | 22        | 73                     |

<sup>a</sup>Condition: Cinnamyl acetate (1 mmol), *p*-cresol (1 mmol), base (2 mmol), Ag-Pd@rutin (14.6 mg, 0.00027 mol% of Ag and 0.000027 mol% of Pd), solvent, temp., time; <sup>b</sup>Yields refer to those of isolated products.

## Section V

### Comparison of the work:

The comparison between different palladium-catalyzed etherification reaction and this work

**Table S5** Few reports on palladium-catalyzed etherification reactions

| Entry | Catalyst                                                                                         | Reaction Conditions                                                                                                                    | Yield (%) | Reusability of the catalyst | Reference |
|-------|--------------------------------------------------------------------------------------------------|----------------------------------------------------------------------------------------------------------------------------------------|-----------|-----------------------------|-----------|
| 1     | Pd(II)-PS-Ala                                                                                    | Cinnamyl acetate and <i>p</i> -cresol, water, K <sub>2</sub> CO <sub>3</sub> , 16 h, reflux                                            | 90        | 5                           | 14        |
| 2     | Fe <sub>3</sub> O <sub>4</sub> -dopamine-Pd                                                      | Cinnamyl acetate and <i>p</i> -cresol, water, NaHCO <sub>3</sub> , 5h, reflux                                                          | 85        | 5                           | 15        |
| 3     | Fe <sub>3</sub> O <sub>4</sub> @SiO <sub>2</sub> Pd                                              | Cinnamyl acetate and <i>p</i> -cresol, water, NaHCO <sub>3</sub> , 6h, reflux                                                          | 85        | 4                           | 16        |
| 4     | Pd(PPh <sub>3</sub> ) <sub>4</sub>                                                               | Allylic acetate and aliphatic alcohol, THF, Et <sub>2</sub> Zn, 25 °C, 2 to 6 h                                                        | 70        | ---                         | 17        |
| 5     | [Pd(η <sup>3</sup> -C <sub>3</sub> H <sub>5</sub> )Cl] <sub>2</sub>                              | 1,3-diphenylpropenyl acetate, benzyl alcohol, CH <sub>3</sub> CN, Cs <sub>2</sub> CO <sub>3</sub> , 10 °C, 24 h under argon atmosphere | 98        | ---                         | 18        |
| 6     | polystyrene-poly(ethylene glycol) copolymer resin supported by Pd-imidazoindolephosphine complex | Allylic ester, phenol, water, K <sub>2</sub> CO <sub>3</sub> , 25 °C, 12 h under N <sub>2</sub> atmosphere                             | 94        | 2                           | 19        |
| 7     | PdCl <sub>2</sub>                                                                                | 2-iodophenol, phenylboronic acid, methylene chloride, DMF, Cs <sub>2</sub> CO <sub>3</sub> , 100 °C, 12 h                              | 74        | ---                         | 20        |
| 8     | Pd(CH <sub>3</sub> CN) <sub>2</sub> Cl <sub>2</sub>                                              | 1,3-diphenylallyl acetate, benzyl alcohol, CH <sub>3</sub> CN, Cs <sub>2</sub> CO <sub>3</sub> , 20 °C, 4 h                            | 86        | 3                           | 21        |
| 9     | Pd(dba) <sub>2</sub>                                                                             | Sodium 4-methoxyphenolate, 1-bromo-2-methylbenzene, toluene, 80 °C, 12 h                                                               | 85        | ---                         | 22        |
| 10    | Pd(OAc) <sub>2</sub>                                                                             | Allyl alcohol, <i>p</i> -cresol, benzene, PPh <sub>3</sub> , 50 °C, 4 -20 h                                                            | 91        | ---                         | 23        |

|    |                      |                                                                                             |    |     |           |
|----|----------------------|---------------------------------------------------------------------------------------------|----|-----|-----------|
| 11 | Pd(OAc) <sub>2</sub> | 3-(2-bromo-phenyl)propan-1-ol, toluene, Ca <sub>2</sub> CO <sub>3</sub> , 50 °C, 21 h       | 85 | --- | 24        |
| 12 | Pd@rutin             | Cinnamyl acetate and <i>p</i> -cresol, water, K <sub>2</sub> CO <sub>3</sub> , 18 h, reflux | 88 | 4   | This work |

## Section VI

### **<sup>1</sup>H and <sup>13</sup>C NMR spectra of synthesized products**

**1-(cinnamyloxy)-4-methylbenzene (Table 8, 3a):** <sup>1</sup>H NMR 300 MHz, CDCl<sub>3</sub> δ 7.34-6.31 (m, 11H), 4.60-4.58 (d, 2H), 2.21 (bs, 3H); <sup>13</sup>C NMR 75 MHz, CDCl<sub>3</sub> δ 156.55, 130, 114.70, 77.08, 68.76, 20.89.

**1-bromo-4-(cinnamyloxy)benzene (Table 8, 3b):** <sup>1</sup>H NMR 300 MHz, CDCl<sub>3</sub> δ 7.34-7.16 (m, 7H), 6.79-6.61 (m, 3H), 6.35-6.26 (m, 1H), 4.60-4.58 (q, 2H); <sup>13</sup>C NMR 75 MHz, CDCl<sub>3</sub> δ 157.69, 130, 116.58, 113.02, 77.10, 68.81.

**(E)-1-bromo-4-((3-(p-tolyl)allyl)oxy)benzene (Table 8, 3c):** <sup>1</sup>H NMR 300 MHz, CDCl<sub>3</sub> δ 7.32-6.23 (m, 10H), 4.59-4.57 (d, 2H), 2.27 (bs, 3H); <sup>13</sup>C NMR 75 MHz, CDCl<sub>3</sub> δ 158.19, 136.42, 134.04, 132.63, 128.35, 127.85, 126.65, 124.19, 117.08, 113.45, 117.08, 113.45, 69.05, 20.59.

**(E)-1-bromo-4-((3-(4-methoxyphenyl)allyl)oxy)-benzene (Table 8, 3d):** <sup>1</sup>H NMR 300 MHz, CDCl<sub>3</sub> δ 7.27-6.17 (m, 10H), 4.55 (bs, 2H), 3.75 (bs, 3H); <sup>13</sup>C NMR 75 MHz, CDCl<sub>3</sub> δ 158, 133, 128, 121.61, 116.66, 114.05, 76.8, 69.13, 55.29.

**(E)-1-methoxy-4-(3-(p-tolyloxy)prop-1-en-1-yl)-benzene (Table 8, 3e):** <sup>1</sup>H NMR 300 MHz, CDCl<sub>3</sub> δ 7.41-6.16 (m, 10H), 4.58-4.56 (d, 2H), 3.73 (bs, 3H), 2.20 (bs, 3H); <sup>13</sup>C NMR 75 MHz, CDCl<sub>3</sub> δ 159.5, 129.82, 121, 114, 76.80, 68.92, 55.22, 20.19.

Fig. S5  $^1\text{H}$  and  $^{13}\text{C}$ -NMR spectra of 1-(cinnamyloxy)-4-methylbenzene (3a).

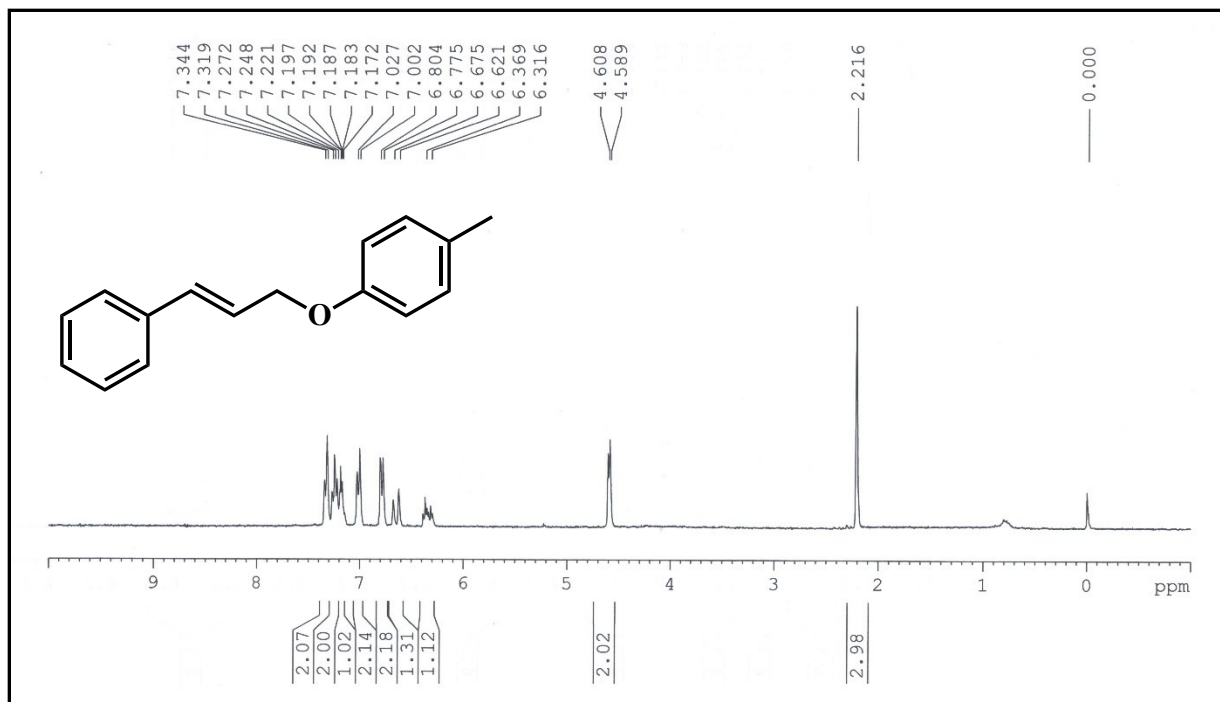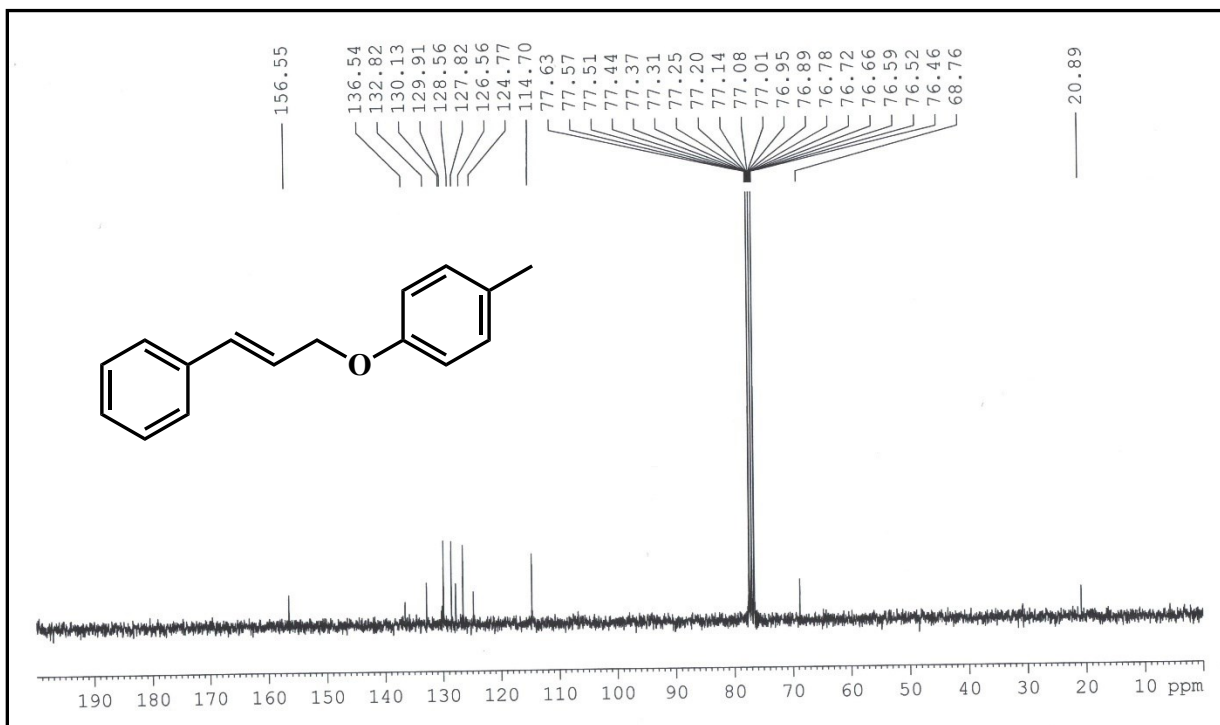



Fig. S6  $^1\text{H}$  and  $^{13}\text{C}$ -NMR spectra of 1-bromo-4-(cinnamyloxy)benzene (3b).

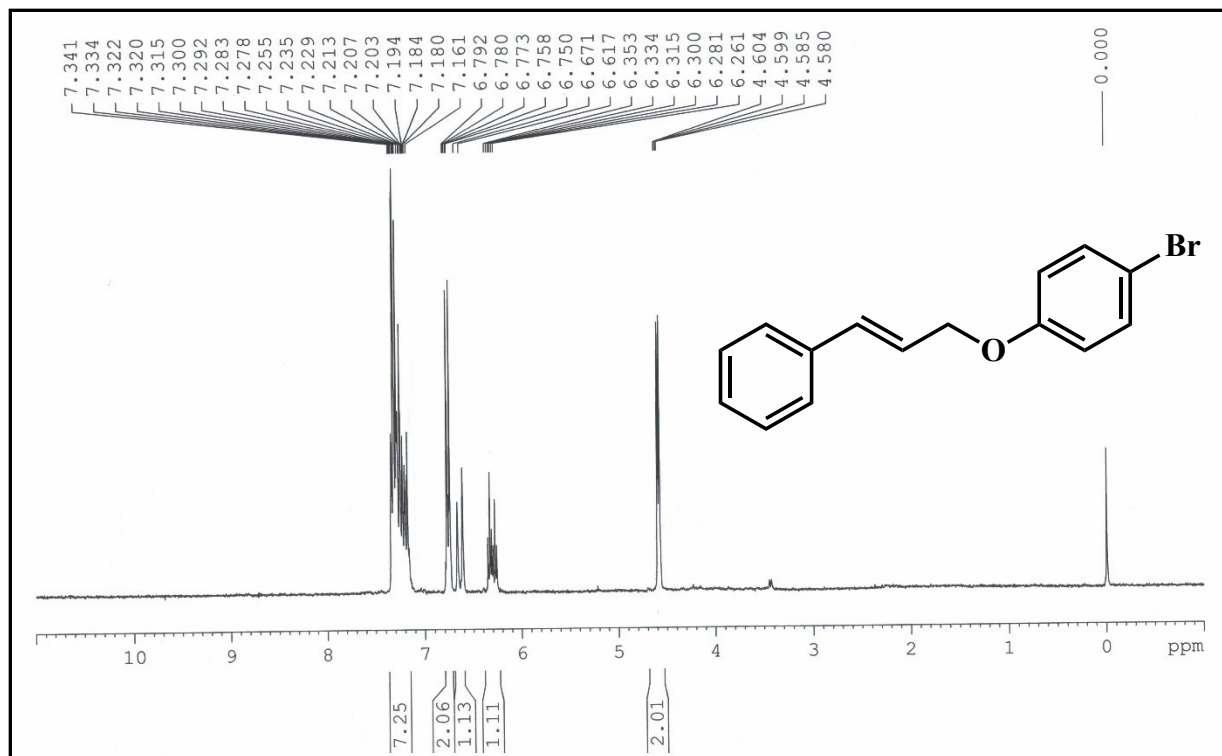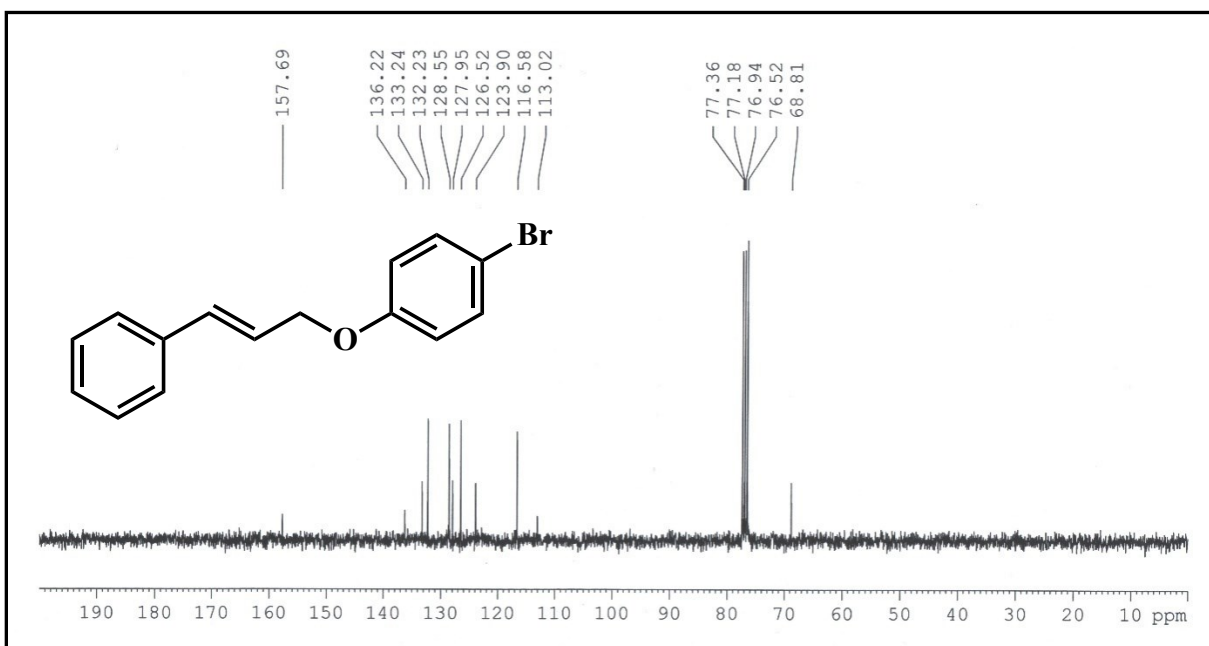

Fig. S7  $^1\text{H}$  and  $^{13}\text{C}$ -NMR spectrum of (E)-1-bromo-4-((3-(p-tolyl)allyl)oxy)benzene (3c).

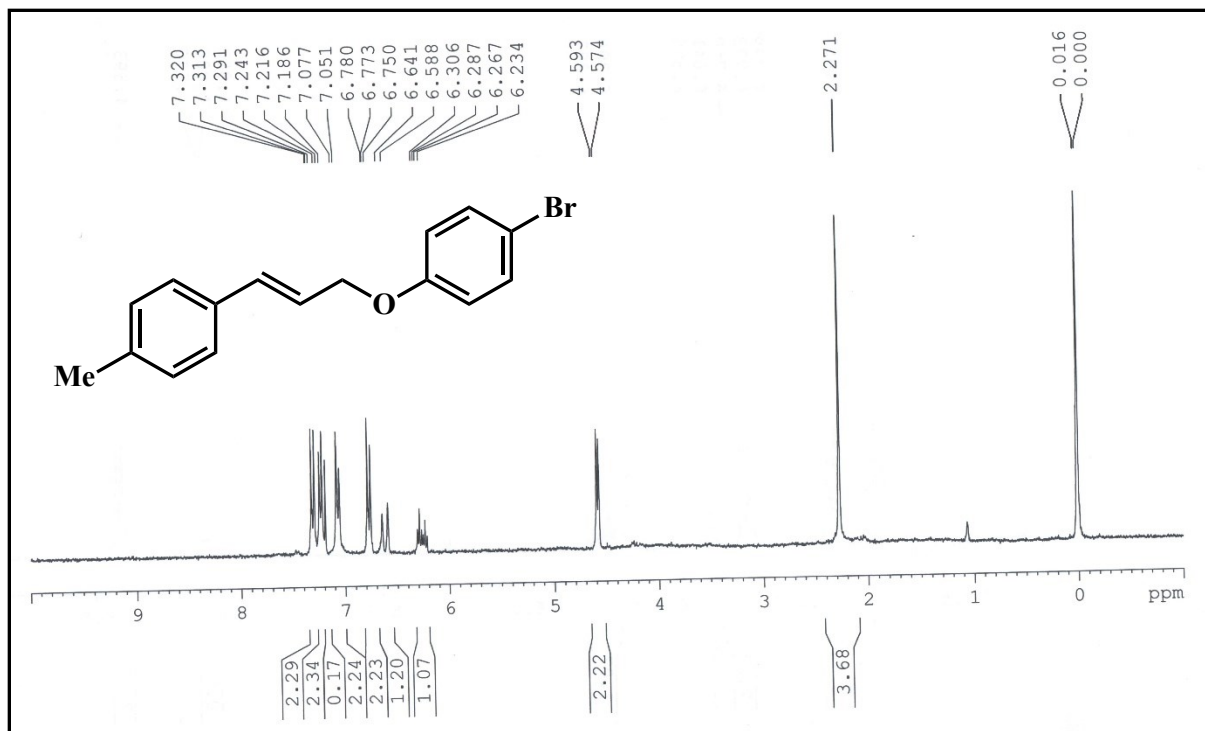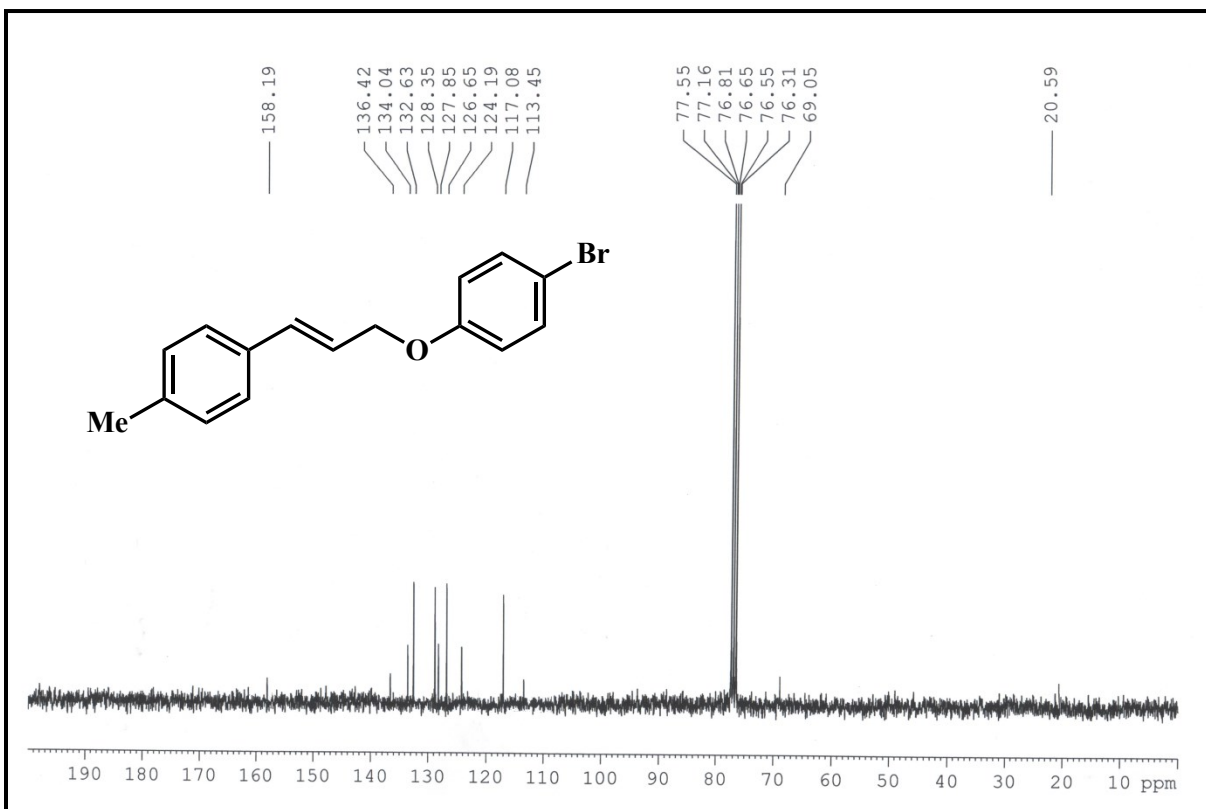

**Fig. S8**  $^1\text{H}$  and  $^{13}\text{C}$ -NMR spectra of (E)-1-bromo-4-((3-(4-methoxyphenyl)allyl)oxy)-benzene (3d).

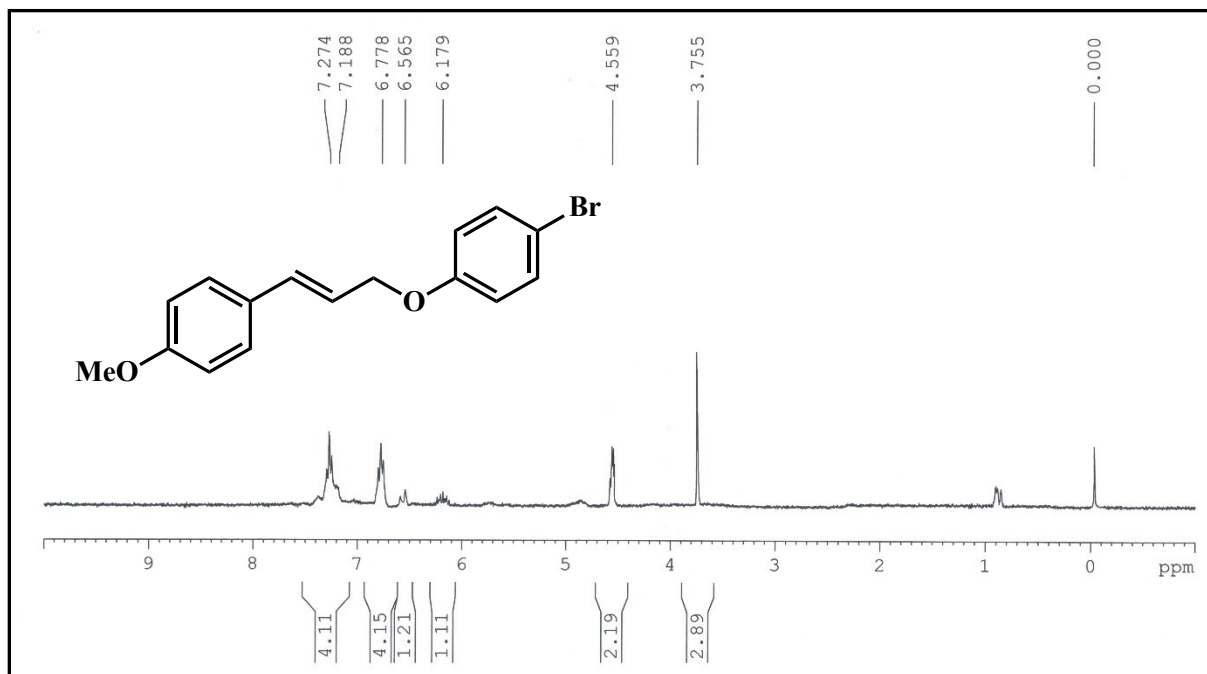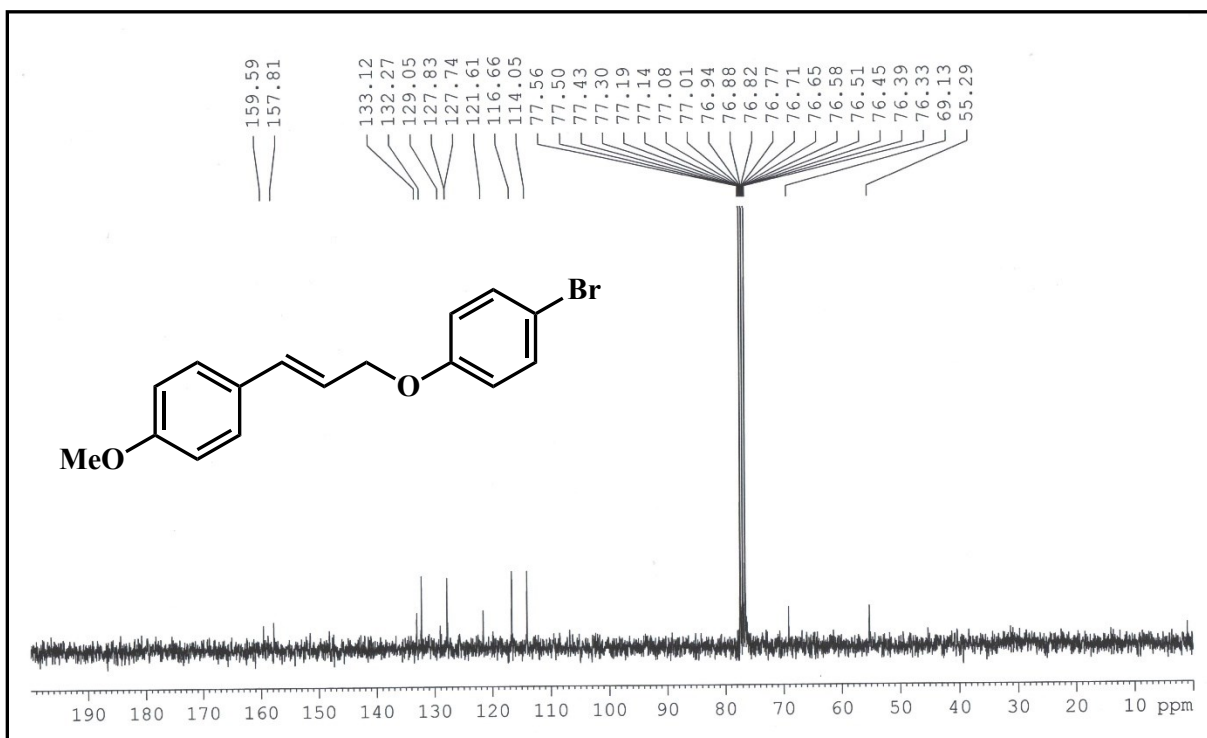

**Fig. S9**  $^1\text{H}$  and  $^{13}\text{C}$ -NMR spectra of (E)-1-methoxy-4-(3-(p-tolyloxy)prop-1-en-1-yl)-benzene (3e).

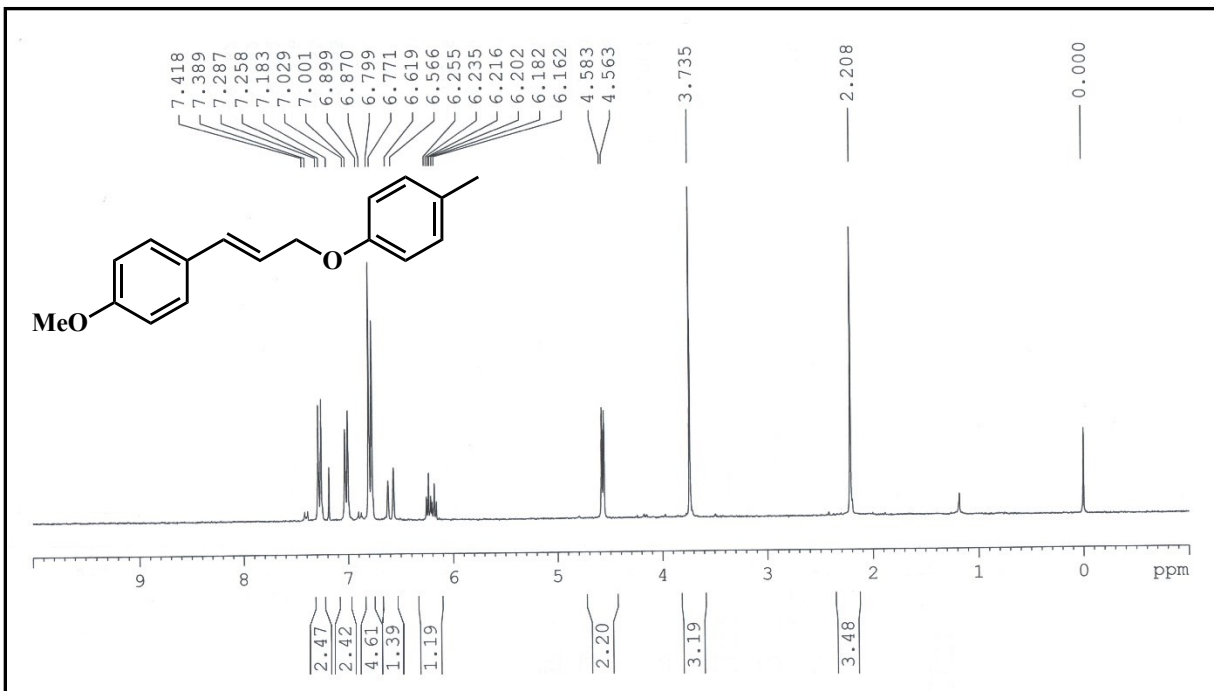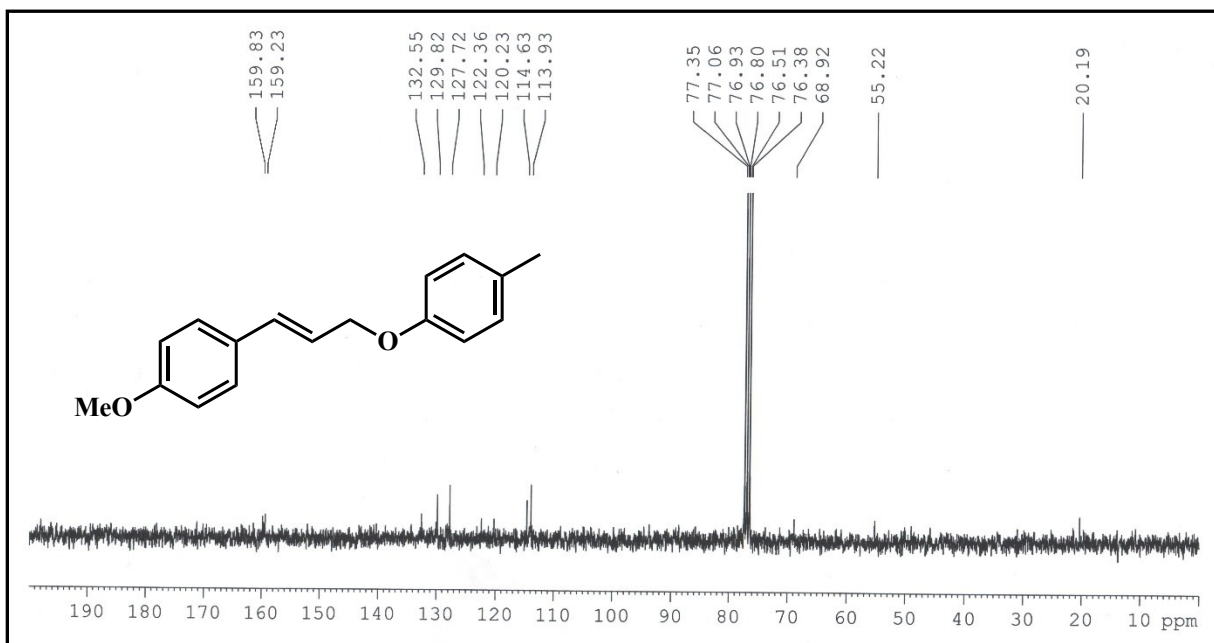

## References:

- 1 S. Pandey, G. K. Goswami, K. K. Nanda, Green synthesis of biopolymer–silver nanoparticle nanocomposite: An optical sensor for ammonia detection, *Int. J. Biol. Macromol.*, 2012, **51**(4), 583-589.
- 2 H. Bar, D. Kr. Bhui, G. P. Sahoo, P. Sarkar, S. P. De, A. Misra, Green synthesis of silver nanoparticles using latex of jatropha curcas, *Colloid. Surf. A: Physicochemical and Engineering Aspects*, 2009, **339**(1-3), 134-139.
- 3 J. Chen, J. Wang, X. Zhang, Y. Jin, Microwave-assisted green synthesis of silver nanoparticles by carboxymethyl cellulose sodium and silver nitrate, *Mater. Chem. Phys.*, 2008, **108**(2-3), 421-424.
- 4 T. J. I. Edison, M. G. Sethuraman, Instant green synthesis of silver nanoparticles using terminalia chebula fruit extract and evaluation of their catalytic activity on reduction of methylene blue, *Process Biochem.*, 2012, **47**(9), 1351-1357.
- 5 P. Prakash, P. Gnanaprakasam, R. Emmanuel, S. Arokiyaraj, M. Saravanan, Green synthesis of silver nanoparticles from leaf extract of mimusops elengi, linn. for enhanced antibacterial activity against multi drug resistant clinical isolates, *Colloid. Surf. B: Biointerfaces*, 2013, **108**, 255-259.
- 6 J. Li, D. Kuang, Y. Feng, F. Zhang, Z. Xu, M. Liu, D. Wang, Green synthesis of silver nanoparticles–graphene oxide nanocomposite and its application in electrochemical sensing of tryptophan, *Biosens. Bioelectron.*, 2013, **42**, 198-206.
- 7 K. Shameli, M. B. Ahmad, W. Md. Z. W. Yunus, A. Rustaiyan, N. A. Ibrahim, M. Zargar, Y. Abdollahi, Green synthesis of silver/montmorillonite/chitosan bionanocomposites using the UV irradiation method and evaluation of antibacterial activity, *Int. J. Nanomedicine*, 2010, **5**, 875-887.
- 8 F. Jiang, R. Yue, Y. Du, J. Xu, P. Yang, A one-pot ‘green’ synthesis of Pd-decorated PEDOT nanospheres for nonenzymatic hydrogen peroxide sensing, *Biosens. Bioelectron.*, 2013, **44**, 127-131.
- 9 T. Sun, Z. Zhang, J. Xiao, C. Chen, F. Xiao, S. Wang, Y. Liu, Facile and green synthesis of palladium nanoparticles-graphene-carbon nanotube material with high catalytic activity, *Sci. Rep.*, 2013, **3**, 1-6.

- 10 A. Hatamifard, M. Nasrollahzadeh, J. Lipkowski, Green synthesis of a natrolite zeolite/palladium nanocomposite and its application as a reusable catalyst for the reduction of organic dyes in a very short time, *RSC Adv.*, 2015, **5**(111), 91372-91381.
- 11 M. Nasrollahzadeh, S. M. Sajadi, A. Rostami-Vartooni, M. Bagherzadeh, Green synthesis of Pd/CuO nanoparticles by theobroma cacao l. seeds extract and their catalytic performance for the reduction of 4-nitrophenol and phosphine-free heck coupling reaction under aerobic conditions, *J. Colloid Interface Sci.*, 2015, **448**, 106-113.
- 12 S. Momeni, I. Nabipour, A simple green synthesis of palladium nanoparticles with sargassum alga and their electrocatalytic activities towards hydrogen peroxide, *Appl. Biochem. Biotech.*, 2015, **176**(7), 1937-1949.
- 13 J. Sun, Y. Fu, G. He, X. Sun, X. Wang, Green Suzuki–Miyaura coupling reaction catalyzed by palladium nanoparticles supported on graphitic carbon nitride, *Appl. Catal. B: Environmental*, 2015, **165**, 661-667.
- 14 M. Halder, M. M. Islam, S. Ahammed, S. M. Islam, Polymeric  $\beta$ -alanine incarcerated Pd (II) catalyzed allylic etherification in water: A mild and efficient method for the formation of C (Sp<sup>3</sup>)–O bonds, *RSC Adv.*, 2016, **6**(10), 8282-8289.
- 15 A. Saha, J. Leazer, R. S. Varma, O-allylation of phenols with allylic acetates in aqueous media using a magnetically separable catalytic system, *Green Chem.*, 2012, **14**(1), 67-71.
- 16 R. B. N. Baig, R. S. Varma, Magnetic silica-supported palladium catalyst: Synthesis of allyl aryl ethers in water, *Ind. Eng. Chem. Res.*, 2014, **53**(49), 18625-18629.
- 17 H. Kin, C. Lee, A mild and efficient method for the streoselective formation of C-O bonds: Palladium-catalyzed allylic etherification using zinc(II) alkoxides, *Org. Lett.*, 2002, **4**(24) 4369-4371.
- 18 J. Xing, P. Cao, J. Liao, Chiral CO/P hybrid ligands: An enantioselective switch in palladium-catalyzed asymmetric allylic etherifications, *Tetrahedron: Asymmetry*, 2012, **23**(8) 527-535.
- 19 Y. Uozumi, M. Kimura, Asymmetric  $\pi$ -allylic etherification of cycloalkenyl esters with phenols in water using a resin-supported chiral palladium complex, *Tetrahedron: Asymmetry*, 2006, **17**(1) 161-166.

- 20 X. Chen, C. Hu, J-P. Wan, Y. Liu, Dichloromethane as methylene donor for the one-pot synthesis of bisaryloxy methanes via williamson etherification and suzuki coupling, *Tetrahedron Lett.*, 2016, **57**(46) 5116-5119.
- 21 L. Dai, X. Li, H. Yuan, X. Li, Z. Li, D. Xu, F. Fei, Y. Liu, J. Zhang, Z. Zhou, Ionic-salt-tagged ferrocenyl diphosphine-imine ligands and their application to palladium-catalyzed asymmetric allylic etherification, *Tetradron: Asymmetry*, 2011, **22**(13) 1379-1389.
- 22 G. Mann, C. Incarvito, A. L. Rheingold, J. F. Hartwig, Palladium-catalyzed C-O coupling involving unactivated aryl halides. Sterically induced reductive elimination to form the C-O bond in diaryl ethers, *J. Am. Chem. Soc.*, 1999, **121**(13) 3224-3225.
- 23 T. Satoh, M. Ikeda, M. Miura, M. Nomura, Palladium-catalysed etherification of allyl alcohols using phenols in the presence of titanium(IV) isopropoxide, *J. Org. Chem.*, 1997, **62**(14) 4877-4879.
- 24 S-i. Kuwabe, K. E. Torraca, S. L. Buchwald, Palladium-catalyzed intramolecular C-O bond formation, *J. Am. Chem. Soc.*, 2001, **123**(49) 12202-12206.
